# Supplementary material for: Caragana korshinskii Kom. plantation reduced soil aggregate stability and aggregate-associated organic carbon on desert steppe
Source: PeerJ. 2022 Feb 16;10:e12507. doi: 10.7717/peerj.12507 (PMC8857906; doi:10.7717/peerj.12507)
Supplement: Supplemental Information 1 [file peerj-10-12507-s001.xls]

## Sheet: dry seiving
0-20cm		①	②	③	④		20-40cm		①	②	③	④
>5mm	NG	56.81	53.322	50.812	54.936		>5mm	NG	51.728	50.002	58.664	58.842
	HD	31.478	26.164	32.636	30.352			HD	24.81	31.358	37.648	27.158
	MD	28.54	40.032	29.93	45.552			MD	35.01	56.456	37.03	58.412
	LD	33.164	36.924	36.156	47.3			LD	32.082	46.156	45.43	44.122
5-2mm	NG	5.342	7.348	6	7.19		5-2mm	NG	5.572	6.834	7.474	7.856
	HD	2.018	3.506	4.584	2.356			HD	3.374	3.362	5.078	2.956
	MD	4.368	4.156	4.584	4.768			MD	4.73	4.408	4.384	6.448
	LD	6.244	3.052	4.432	3.98			LD	5.704	4.122	5.278	5.886
2-0.25mm	NG	8.636	11.512	8.376	11.016		2-0.25mm	NG	6.312	9.602	10.512	10.162
	HD	6.688	5.81	4.436	4.136			HD	7.51	4.48	9.594	9.738
	MD	11.948	7.598	5.884	7.5			MD	10.024	10.05	11.726	10.714
	LD	7.958	6.998	7.516	5.824			LD	11.772	7.37	10.518	10.87
<0.25mm	NG	29.212	27.818	34.812	26.858		<0.25mm	NG	36.388	33.562	23.35	23.14
	HD	59.816	64.52	58.344	63.156			HD	64.306	60.8	47.68	60.148
	MD	55.144	48.214	59.602	42.18			MD	50.236	29.086	46.86	24.426
	LD	52.634	53.026	51.896	42.896			LD	50.442	42.352	38.774	39.122
0-20cm		①	②	③	④	20-40cm	①	②	③	④
>0.25mm	NG	70.788	72.182	65.188	73.142	>0.25mm	63.612	66.438	76.65	76.86
	HD	40.184	35.48	41.656	36.844		35.694	39.2	52.32	39.852
	MD	44.856	51.786	40.398	57.82		49.764	70.914	53.14	75.574
	LD	47.366	46.974	48.104	57.104		49.558	57.648	61.226	60.878
		0-20cm				20-40cm
		＞5 mm	5-2 mm	2-0.25 mm	＜0.25 mm	＞5 mm	5-2 mm	2-0.25 mm	＜0.25 mm
average	NG	53.97	6.47	9.8875	29.675	54.8075	6.9325	9.145	29.11
	HD	30.1575	3.1175	5.27	61.46	30.245	3.6925	7.83	58.235
	MD	36.0125	4.47	8.2325	51.2825	46.7275	4.9925	10.6275	37.655
	LD	38.385	4.425	7.075	50.115	41.9475	5.2475	10.1325	42.67
SE	NG	1.272	0.4822	0.8033	1.7783	2.3037	0.5013	0.9634	3.4353
	HD	1.4121	0.5825	0.5968	1.434	2.8156	0.4723	1.2271	3.635
	MD	4.0819	0.1317	1.3003	3.8336	6.2085	0.4922	0.4005	6.3991
	LD	3.0805	0.6698	0.4621	2.4163	3.3161	0.3968	0.9577	2.7124
0.05	NG	a	a	a	c	a	a	a	c
	HD	b	b	c	a	c	c	a	a
	MD	b	b	ab	b	ab	bc	a	bc
	LD	b	b	bc	b	bc	b	a	b
		>5 mm	2-5 mm	0.25-2 mm	<0.25 mm	>0.25 mm	>0.25mm SE
0-20cm	NG	53.97	6.47	9.8875	29.675	70.325	1.7783	a
	LD	38.385	4.425	7.075	50.115	49.885	2.4163	b
	MD	36.0125	4.47	8.2325	51.2825	48.7175	3.8336	b
	HD	30.1575	3.1175	5.27	61.46	38.54	1.434	c
20-40cm	NG	54.8075	6.9325	9.145	29.11	70.89	3.4353	a
	LD	41.9475	5.2475	10.1325	42.67	57.33	2.7124	b
	MD	46.7275	4.9925	10.6275	37.655	62.345	6.3991	ab
	HD	30.245	3.6925	7.83	58.235	41.765	3.635	c

## Sheet: wet seiving
0-20cm		①	②	③	④		20-40cm		①	②	③	④
>2mm	NG	13.48	14.24	17.1	13.94		>2mm	NG	8.16	1.22	3.42	1.06
	HD	0.94	0.66	8.78	1			HD	1.96	1.74	2.82	0.78
	MD	11.02	13.38	14.61	13.3			MD	29.58	28.24	32.94	32.74
	LD	17.46	17.4	20	13.1			LD	17.12	5.1	27.82	23.58
0.5-2mm	NG	4.76	7.68	2.72	2.94		0.5-2mm	NG	2.56	1.36	2	1.14
	HD	1.1	0.66	0.62	0.36			HD	2.54	0.36	2.86	1.64
	MD	1.92	1.46	1.9	2.62			MD	3.08	3.5	4.76	9.02
	LD	1.32	1.52	1.98	2.3			LD	3.84	3.24	4.46	4.96
0.5-0.25mm	NG	5.56	8.18	4.4	7.92		0.5-0.25mm	NG	3.96	5.98	3.6	5.76
	HD	6.12	4.08	2.36	2.84			HD	4.52	4.86	4.46	9.26
	MD	10.7	7	4.4	4.62			MD	7.42	7.78	7.46	7.06
	LD	4.26	5.68	5.12	5.02			LD	7.32	9.02	7.68	7.56
<0.25mm	NG	76.2	69.9	75.78	75.2		<0.25mm	NG	85.32	91.44	90.98	92.04
	HD	91.84	94.6	88.24	95.8			HD	90.98	93.04	89.86	88.32
	MD	76.36	78.16	79.09	79.46			MD	59.92	60.48	54.84	51.18
	LD	76.96	75.4	72.9	79.58			LD	71.72	82.64	60.04	63.9
0-20cm		①	②	③	④	20-40cm	①	②	③	④
>0.25mm	NG	23.8	30.1	24.22	24.8	>0.25mm	14.68	8.56	9.02	7.96
	HD	8.16	5.4	11.76	4.2		9.02	6.96	10.14	11.68
	MD	23.64	21.84	20.91	20.54		40.08	39.52	45.16	48.82
	LD	23.04	24.6	27.1	20.42		28.28	17.36	39.96	36.1
		0-20cm				20-40cm
		＞2 mm	0.5-2 mm	0.25-0.5 mm	＜0.25 mm	＞2 mm	0.5-2 mm	0.25-0.5 mm	＜0.25 mm
average	NG	14.69	4.525	6.515	74.27	3.465	1.765	4.825	89.945
	HD	2.845	0.685	3.85	92.62	1.825	1.85	5.775	90.55
	MD	13.0775	1.975	6.68	78.2675	30.875	5.09	7.43	56.605
	LD	16.99	1.78	5.02	76.21	18.405	4.125	7.895	69.575
SE	NG	0.8184	1.1467	0.9189	1.471	1.655	0.3217	0.6094	1.5569
	HD	1.9797	0.1535	0.8389	1.6789	0.4191	0.5598	1.165	0.9931
	MD	0.7485	0.2398	1.4636	0.6921	1.1677	1.3578	0.1473	2.2089
	LD	1.4312	0.2217	0.292	1.4003	4.9506	0.3735	0.3824	4.9868
0.05	NG	a	a	a	b	c	b	b	a
	HD	b	b	a	a	c	b	ab	a
	MD	a	b	a	b	a	a	a	c
	LD	a	b	a	b	b	ab	a	b
		>2 mm	0.5-2 mm	0.25-0.5 mm	<0.25 mm	>0.25 mm	>0.25mm SE
0-20cm	NG	14.69	4.525	6.515	74.27	25.73	1.471	a
	LD	16.99	1.78	5.02	76.21	23.79	1.4003	a
	MD	13.0775	1.975	6.68	78.2675	21.7325	0.6921	a
	HD	2.845	0.685	3.85	92.62	7.38	1.6789	b
20-40cm	NG	3.465	1.765	4.825	89.945	10.055	1.5569	c
	LD	18.405	4.125	7.895	69.575	30.425	4.9868	b
	MD	30.875	5.09	7.43	56.605	43.395	2.2089	a
	HD	1.825	1.85	5.775	90.55	9.45	0.9931	c

## Sheet: stability
dry		D		MWD		GMD		K
		①	②	①	②	①	②	①	②
0-20cm	NG	2.79185	2.74725	4.37048	4.48399	1.61196	1.81816	0.0242211	0.0220254
	HD	2.91255	2.9242	2.64118	2.3438	0.566462	0.473532	0.0623492	0.0743741
	MD	2.90005	2.8613	2.49089	3.49213	0.547571	0.952104	0.0642732	0.0379484
	LD	2.848	2.87355	2.93187	3.39617	0.705008	0.892881	0.050021	0.041796
20-40cm	NG	2.6929	2.7322	4.51651	4.49668	1.80876	1.84134	0.0229635	0.0225764
	HD	2.89035	2.91365	2.64679	2.43189	0.631255	0.510138	0.0614861	0.0691794
	MD	2.866	2.75355	3.01749	4.63651	0.760289	1.40126	0.0465307	0.0341131
	LD	2.8475	2.83915	3.26069	3.69816	0.913091	1.09115	0.0414873	0.0329866
wet		D		MWD		GMD		K
		①	②	①	②	①	②	①	②
0-20cm	NG	2.9364	2.92075	0.960013	0.916	0.252851	0.257826	0.133186	0.131047
	HD	2.97585	2.9871	0.395075	0.17725	0.160904	0.135201	0.192077	0.215489
	MD	2.9439	2.94755	0.837194	0.85925	0.228409	0.229233	0.145101	0.144571
	LD	2.94055	2.94565	1.1426	0.966325	0.275865	0.245615	0.123592	0.136922
20-40cm	NG	2.96885	2.9769	0.453463	0.205763	0.170425	0.142559	0.183682	0.207855
	HD	2.9723	2.97405	0.277737	0.209725	0.151415	0.144176	0.199297	0.206268
	MD	2.87795	2.86575	1.79522	1.78679	0.474344	0.487067	0.0745008	0.0733543
	LD	2.9052	2.9242	1.34797	0.919775	0.349224	0.269265	0.103039	0.13686
variance analysis
		D		MWD		GMD		K					D		MWD		GMD		K
dry		0-20cm	20-40cm	0-20cm	20-40cm	0-20cm	20-40cm	0-20cm	20-40cm		wet		0-20cm	20-40cm	0-20cm	20-40cm	0-20cm	20-40cm	0-20cm	20-40cm
average	NG	2.77	2.71	4.425	4.51	1.715	1.825	0.023	0.022		average	NG	2.93	2.975	0.94	0.33	0.255	0.155	0.132	0.1955
	HD	2.915	2.9	2.49	2.54	0.52	0.57	0.0683	0.0625			HD	2.985	2.97	0.29	0.245	0.15	0.145	0.2032	0.2029
	MD	2.88	2.81	2.99	3.83	0.75	1.08	0.0509	0.0366			MD	2.945	2.875	0.85	1.795	0.23	0.48	0.1449	0.0732
	LD	2.86	2.845	3.165	3.48	0.8	1	0.0449	0.036			LD	2.945	2.915	1.055	1.135	0.265	0.31	0.13	0.1128
SE	NG	0.02	0.02	0.055	0.01	0.105	0.015	0.001	0.0001		标准误	NG	0.01	0.005	0.02	0.12	0.005	0.015	0.0011	0.0125
	HD	0.005	0.01	0.15	0.11	0.05	0.06	0.006	0.0066			HD	0.005	0	0.11	0.035	0.01	0.005	0.0124	0.0035
	MD	0.02	0.06	0.5	0.81	0.2	0.32	0.0135	0.0099			MD	0.005	0.005	0.01	0.005	0	0.01	0.0002	0.001
	LD	0.01	0.005	0.235	0.22	0.09	0.09	0.0051	0.003			LD	0.005	0.005	0.085	0.215	0.015	0.04	0.0065	0.0133
0.05	NG	b	b	a	a	a	a	b	b		0.05	NG	b	a	a	c	a	c	b	a
	HD	a	a	b	b	b	b	a	a			HD	a	a	b	c	b	c	a	a
	MD	a	ab	b	ab	b	b	ab	b			MD	b	c	a	a	a	a	b	c
	LD	a	a	b	ab	b	b	ab	b			LD	b	b	a	b	a	b	b	b
SE	0-20cm	D	MWD	GMD	K		20-40cm	D	MWD	GMD	K
	dry	0.02	0.055	0.105	0.001	NG	dry	0.02	0.01	0.015	0.0001	NG
		0.01	0.235	0.09	0.0051	LD		0.005	0.22	0.09	0.003	LD
		0.02	0.5	0.2	0.0135	MD		0.06	0.81	0.32	0.0099	MD
		0.005	0.15	0.05	0.006	HD		0.01	0.11	0.06	0.0066	HD
	wet	0.01	0.02	0.005	0.0011	NG	wet	0.005	0.12	0.015	0.0125	NG
		0.005	0.085	0.015	0.0065	LD		0.005	0.215	0.04	0.0133	LD
		0.005	0.01	0	0.0002	MD		0.005	0.005	0.01	0.001	MD
		0.005	0.11	0.01	0.0124	HD		0	0.035	0.005	0.0035	HD
		D								MWD
		0-20cm	20-40cm	0-20cm	20-40cm	0-20cm	20-40cm			0-20cm	20-40cm	0-20cm	20-40cm	0-20cm	20-40cm
dry	NG	2.77	2.71	b	b	0.02	0.02	dry	NG	4.425	4.51	a	a	0.055	0.01
	LD	2.86	2.845	a	a	0.01	0.005		LD	3.165	3.48	b	ab	0.235	0.22
	MD	2.88	2.81	a	ab	0.02	0.06		MD	2.99	3.83	b	ab	0.5	0.81
	HD	2.915	2.9	a	a	0.005	0.01		HD	2.49	2.54	b	b	0.15	0.11
wet	NG	2.93	2.975	b	a	0.01	0.005	wet	NG	0.94	0.33	a	c	0.02	0.12
	LD	2.945	2.915	b	b	0.005	0.005		LD	1.055	1.135	a	b	0.085	0.215
	MD	2.945	2.875	b	c	0.005	0.005		MD	0.85	1.795	a	a	0.01	0.005
	HD	2.985	2.97	a	a	0.005	0		HD	0.29	0.245	b	c	0.11	0.035
		GMD
		0-20cm	20-40cm	0-20cm	20-40cm	0-20cm	20-40cm
dry	NG	1.715	1.825	a	a	0.105	0.015
	LD	0.8	1	b	b	0.09	0.09
	MD	0.75	1.08	b	b	0.2	0.32
	HD	0.52	0.57	b	b	0.05	0.06
wet	NG	0.255	0.155	a	c	0.005	0.015
	LD	0.265	0.31	a	b	0.015	0.04
	MD	0.23	0.48	a	a	0	0.01
	HD	0.15	0.145	b	c	0.01	0.005
		PAD					PAD
		①	②				0-20cm	20-40cm
0-20cm	NG	64.6122	62.1966		average	CK	63.405	85.48
	LD	75.7311	86.6904			B4	81.21	77.07
	MD	47.769	61.1512			B6	54.46	28.54
	HD	47.5106	55.9356			B8	51.725	47.06
20-40cm	NG	82.5774	88.3797		SE	CK	1.205	2.9
	LD	77.6745	76.4682			4m	5.48	0.6
	MD	17.2384	39.8358			6m	6.69	11.3
	HD	38.8346	55.2936			8m	4.215	8.23
					0.05	CK	ab	a
						4m	a	a
						6m	b	b
						8m	b	b
	PAD
	0-20cm	20-40cm	0-20cm	20-40cm
NG	63.405	85.48	ab	a
LD	51.725	47.06	b	b
MD	54.46	28.54	b	b
HD	81.21	77.07	a	a

## Sheet: PCA
	-	+	+	-	+	+	+	+	+	+	+
number	D-D	D-MWD	D-GMD	PAD	SOC	TN	BD	AP	TP	AN	D-WR0.25
1	2.7766	4.58076	1.79569	66.3785	4.65482	0.129246	148.84	2.46331	0.309702	16.8716	70.788
2	2.9163	2.55224	0.533192	79.6934	4.67068	0.0691014	152.96	4.04749	0.225851	15.3659	65.188
3	2.8898	2.44865	0.551969	47.298	7.65016	0.0686075	147.95	3.36773	0.24092	11.661	63.612
4	2.8778	2.86054	0.690026	51.3575	2.38147	0.056907	151.6	2.91267	0.250711	22.2139	76.65
5	2.8071	4.16019	1.42823	62.8459	4.67068	0.113496	138.92	2.45909	0.297765	20.1439	40.184
6	2.9088	2.73011	0.599732	71.7688	4.00713	0.0926013	153.19	3.25894	0.216866	11.8357	41.656
7	2.9103	2.53313	0.543174	48.24	6.59427	0.0649846	150.3	2.57206	0.211089	10.1294	35.694
8	2.8182	3.0032	0.719991	43.6637	4.11348	0.0644311	151.31	3.59502	0.26827	21.9763	52.32
9	2.6701	4.20634	1.42472	76.9226	6.11803	0.0764816	142.18	2.4635	0.338589	15.1316	44.856
10	2.9175	2.13015	0.43792	74.7296	5.3923	0.0558352	154.96	2.46144	0.274381	9.98157	40.398
11	2.8752	2.94491	0.722812	19.4599	7.06336	0.0963603	137.42	3.37029	0.253079	14.8542	49.764
12	2.8676	2.7842	0.687977	42.9356	4.65022	0.0766638	150.32	3.47914	0.256029	15.3216	53.14
13	2.7157	4.82667	2.1928	88.2322	6.37406	0.0731515	146.19	1.90379	0.305937	11.5895	47.366
14	2.8632	3.16343	0.82459	80.6193	6.49012	0.0646231	144.28	2.46036	0.249137	13.3834	48.104
15	2.8568	3.09006	0.797766	15.0169	5.68958	0.148497	143.1	3.26063	0.302559	19.969	49.558
16	2.8274	3.73719	1.13821	34.7336	4.34507	0.0852753	151.29	2.80806	0.261613	18.1307	61.226
17	2.7487	4.43151	1.77234	58.2999	3.6396	0.096551	149.07	2.24088	0.339634	16.2775	72.182
18	2.9224	2.21695	0.449349	84.7802	5.31308	0.0804751	146.57	4.73498	0.244664	14.8506	73.142
19	2.8705	3.27914	0.837198	57.8264	4.47323	0.0964555	145.32	4.72515	0.266122	15.2279	66.438
20	2.8908	2.99771	0.697212	47.6306	4.4605	0.0809397	145.88	3.48944	0.29365	16.9241	76.86
21	2.7458	4.53647	1.86397	66.0934	0.361283	0.0960567	155	2.91035	0.326747	11.9596	35.48
22	2.926	2.47065	0.497715	88.6006	3.65633	0.068881	151.39	3.44234	0.22825	13.5687	36.844
23	2.8521	3.70511	1.06701	64.476	4.26299	0.0928035	140.03	2.69415	0.276897	16.8708	39.2
24	2.8563	3.79464	1.08855	64.2407	5.36763	0.0486801	151.45	2.46321	0.253121	15.2136	39.852
25	2.7485	4.14726	1.4746	87.1158	3.63295	0.0807468	152.67	3.37217	0.330597	20.5697	51.786
26	2.9159	2.58587	0.540809	82.2449	4.59118	0.0722559	153.57	3.82486	0.225298	11.4486	57.82
27	2.7738	4.51763	0.736093	44.2705	3.48069	0.128786	146.12	2.34666	0.267582	19.7951	70.914
28	2.853	3.72485	1.06711	69.8862	5.11278	0.0600946	153.36	2.91535	0.243076	15.2009	75.574
29	2.7159	4.8461	2.20809	89.6435	5.38261	0.0892647	149.12	3.49112	0.297674	9.98399	46.974
30	2.9114	2.27791	0.479468	70.6916	4.38152	0.0478306	156.21	2.11977	0.197456	13.7077	57.104
31	2.7333	4.75539	2.06644	35.4011	2.32248	0.189079	133.73	3.03391	0.393593	23.0888	57.648
32	2.8253	3.67146	1.11519	40.7011	5.17127	0.112443	137.75	2.46065	0.335703	21.2586	60.878
standardization
	-	+	+	-	+	+	+	+	+	+	+
number	D-D	D-MWD	D-GMD	PAD	SOC	TN	BD	AP	TP	AN	D-WR0.25
1	0.583822	0.908804	0.767032	0.311753	0.589054	0.573837	0.672153	0.197626	0.572284	0.525669	0.853262
2	0.0379054	0.15653	0.0538212	0.133332	0.591229	0.145452	0.855427	0.757175	0.144773	0.410789	0.717931
3	0.141462	0.118115	0.0644285	0.567432	1	0.141934	0.632562	0.517077	0.221604	0.128131	0.679845
4	0.188355	0.270862	0.142419	0.513034	0.277161	0.0585967	0.794929	0.356346	0.271521	0.933255	0.994925
5	0.464635	0.752835	0.559447	0.359089	0.591229	0.461658	0.230872	0.196135	0.511423	0.775324	0.113678
6	0.0672138	0.222495	0.0914105	0.239522	0.500194	0.312832	0.865658	0.478651	0.0989623	0.141463	0.149251
7	0.0613521	0.149442	0.05946	0.554809	0.855138	0.11613	0.7371	0.236039	0.0695087	0.0112823	0.00517158
8	0.421258	0.323769	0.159347	0.616131	0.514785	0.112187	0.782028	0.597356	0.361048	0.915129	0.40696
9	1	0.769949	0.557463	0.170461	0.7898	0.198018	0.37589	0.197696	0.719563	0.392917	0.226583
10	0.0332161	0	0	0.199847	0.690233	0.0509626	0.944395	0.196967	0.392201	0	0.11885
11	0.198515	0.302153	0.160941	0.940465	0.919493	0.339605	0.164146	0.517979	0.283592	0.371753	0.345191
12	0.228214	0.242553	0.141262	0.625889	0.588422	0.199315	0.737989	0.556427	0.298635	0.407414	0.426776
13	0.821805	1	0.991364	0.0189113	0.824925	0.174299	0.55427	0	0.553087	0.122677	0.28724
14	0.245408	0.383188	0.218437	0.120925	0.840848	0.113555	0.469306	0.196585	0.263495	0.25954	0.305075
15	0.270418	0.355981	0.203284	1	0.731018	0.71095	0.416815	0.479249	0.535867	0.761977	0.340213
16	0.385307	0.595966	0.395604	0.735796	0.546558	0.260651	0.781139	0.319394	0.327105	0.62173	0.622185
17	0.692849	0.853455	0.753841	0.420007	0.44977	0.340963	0.682384	0.119063	0.724894	0.480344	0.88695
18	0.014068	0.0321896	0.00645684	0.0651691	0.679364	0.226462	0.571174	1	0.240693	0.37148	0.91015
19	0.216882	0.426099	0.22556	0.42635	0.564141	0.340283	0.515569	0.99653	0.350094	0.400264	0.748139
20	0.137554	0.321734	0.146479	0.562975	0.562394	0.229771	0.54048	0.560065	0.490444	0.529671	1
21	0.704181	0.89238	0.805604	0.315573	0	0.337443	0.946174	0.355526	0.659189	0.150908	0
22	0	0.126274	0.0337795	0.0139752	0.452065	0.143882	0.785587	0.543431	0.157004	0.273677	0.0329628
23	0.288785	0.584071	0.355384	0.337246	0.535297	0.314272	0.280249	0.279163	0.405027	0.525606	0.0898985
24	0.272372	0.617271	0.367553	0.340399	0.686847	0	0.788256	0.197591	0.283808	0.399176	0.105655
25	0.69363	0.748041	0.585642	0.0338713	0.448858	0.228397	0.842527	0.518645	0.678817	0.807812	0.394055
26	0.0394685	0.169005	0.0581241	0.0991418	0.580323	0.16792	0.882562	0.678537	0.141953	0.111925	0.539874
27	0.594764	0.88539	0.168443	0.608	0.427968	0.570557	0.551157	0.156426	0.357539	0.748715	0.856307
28	0.285268	0.591391	0.355441	0.264749	0.651883	0.0813005	0.873221	0.35729	0.232596	0.398204	0.968922
29	0.821024	1.0072	1	0	0.688902	0.289066	0.684609	0.560657	0.51096	0.000184722	0.277767
30	0.0570535	0.0547974	0.0234712	0.253957	0.551558	0	1	0.0762854	0	0.284279	0.522571
31	0.753029	0.973563	0.919979	0.726852	0.269068	1	0	0.399166	1	1	0.535718
32	0.393513	0.571592	0.382601	0.655831	0.659907	0.454152	0.178826	0.196689	0.704853	0.860373	0.613775
SPSS (PCA)
	Explained total variance									Component matrix a
	ingredient	Initial eigenvalue			Extract the sum of squares and load						ingredient
		SUM	variance%	cumulative%	SUM	variance%	cumulative%				1	2	3
	1	4.555	41.409	41.409	4.555	41.409	41.409		D-D	VAR00001	0.874	-0.353	0.027
	2	2.165	19.685	61.094	2.165	19.685	61.094		D-MWD	VAR00002	0.901	-0.31	0.067
	3	1.382	12.56	73.655	1.382	12.56	73.655		D-GMD	VAR00003	0.85	-0.429	0.05
	4	0.878	7.98	81.635	0.878	7.98	81.635		PAD	VAR00004	0.221	0.75	-0.285
	5	0.816	7.419	89.054	0.816	7.419	89.054		SOC	VAR00005	-0.327	-0.03	-0.782
	6	0.421	3.826	92.88					TN	VAR00006	0.732	0.442	-0.066
	7	0.322	2.927	95.807					BD	VAR00007	-0.57	-0.445	0.541
	8	0.2	1.816	97.623					AP	VAR00008	-0.36	0.401	0.334
	9	0.139	1.265	98.888					TP	VAR00009	0.916	0.003	0.024
	10	0.088	0.801	99.688					AN	VAR00010	0.518	0.633	0.236
	11	0.034	0.312	100					D-WR0.25	VAR00011	0.028	0.491	0.465
										a Three components have been extracted.
	Load matrix (component matrix)			Eigenvalues			Eigenvalues^2			coefficient
	1	2	3	PC1	PC2	PC3	1	2	3	1	2	3
D-D	0.874	-0.353	0.027	4.555	2.165	1.382	2.13424	1.47139	1.17558	0.409513	-0.239909	0.0229673
D-MWD	0.901	-0.31	0.067	4.555	2.165	1.382	2.13424	1.47139	1.17558	0.422163	-0.210685	0.0569929
D-GMD	0.85	-0.429	0.05	4.555	2.165	1.382	2.13424	1.47139	1.17558	0.398267	-0.29156	0.042532
PAD	0.221	0.75	-0.285	4.555	2.165	1.382	2.13424	1.47139	1.17558	0.10355	0.509721	-0.242432
SOC	-0.327	-0.03	-0.782	4.555	2.165	1.382	2.13424	1.47139	1.17558	-0.153216	-0.0203888	-0.665201
TN	0.732	0.442	-0.066	4.555	2.165	1.382	2.13424	1.47139	1.17558	0.342978	0.300395	-0.0561423
BD	-0.57	-0.445	0.541	4.555	2.165	1.382	2.13424	1.47139	1.17558	-0.267073	-0.302434	0.460196
AP	-0.36	0.401	0.334	4.555	2.165	1.382	2.13424	1.47139	1.17558	-0.168678	0.272531	0.284114
TP	0.916	0.003	0.024	4.555	2.165	1.382	2.13424	1.47139	1.17558	0.429192	0.00203888	0.0204154
AN	0.518	0.633	0.236	4.555	2.165	1.382	2.13424	1.47139	1.17558	0.242709	0.430204	0.200751
D-WR0.25	0.028	0.491	0.465	4.555	2.165	1.382	2.13424	1.47139	1.17558	0.0131194	0.333697	0.395548
	Indexes	Factors			Coefficient matrix
		1	2	3	1	2	3
D-D	X1	0.874	-0.353	0.027	0.409513	-0.239909	0.0229673
D-MWD	X2	0.901	-0.31	0.067	0.422163	-0.210685	0.0569929
D-GMD	X3	0.85	-0.429	0.05	0.398267	-0.29156	0.042532
PAD	X4	0.221	0.75	-0.285	0.10355	0.509721	-0.242432
SOC	X5	-0.327	-0.03	-0.782	-0.153216	-0.0203888	-0.665201
TN	X6	0.732	0.442	-0.066	0.342978	0.300395	-0.0561423
BD	X7	-0.57	-0.445	0.541	-0.267073	-0.302434	0.460196
AP	X8	-0.36	0.401	0.334	-0.168678	0.272531	0.284114
TP	X 9	0.916	0.003	0.024	0.429192	0.00203888	0.0204154
AN	X10	0.518	0.633	0.236	0.242709	0.430204	0.200751
D-WR0.25	X11	0.028	0.491	0.465	0.0131194	0.333697	0.395548
	Eigenvalue	4.555	2.165	1.382
	Variance (%)	41.409	19.685	12.56
	Cumulative variance (%)	41.409	61.094	73.655
	F	0.562202	0.26726	0.170525
	D-D	D-MWD	D-GMD	PAD	SOC	TN	BD	AP	TP	AN	D-WR0.25
1	0.583822	0.908804	0.767032	0.311753	0.589054	0.573837	0.672153	0.197626	0.572284	0.525669	0.853262
2	0.0379054	0.15653	0.0538212	0.133332	0.591229	0.145452	0.855427	0.757175	0.144773	0.410789	0.717931
3	0.141462	0.118115	0.0644285	0.567432	1	0.141934	0.632562	0.517077	0.221604	0.128131	0.679845
4	0.188355	0.270862	0.142419	0.513034	0.277161	0.0585967	0.794929	0.356346	0.271521	0.933255	0.994925
5	0.464635	0.752835	0.559447	0.359089	0.591229	0.461658	0.230872	0.196135	0.511423	0.775324	0.113678
6	0.0672138	0.222495	0.0914105	0.239522	0.500194	0.312832	0.865658	0.478651	0.0989623	0.141463	0.149251
7	0.0613521	0.149442	0.05946	0.554809	0.855138	0.11613	0.7371	0.236039	0.0695087	0.0112823	0.00517158
8	0.421258	0.323769	0.159347	0.616131	0.514785	0.112187	0.782028	0.597356	0.361048	0.915129	0.40696
9	1	0.769949	0.557463	0.170461	0.7898	0.198018	0.37589	0.197696	0.719563	0.392917	0.226583
10	0.0332161	0	0	0.199847	0.690233	0.0509626	0.944395	0.196967	0.392201	0	0.11885
11	0.198515	0.302153	0.160941	0.940465	0.919493	0.339605	0.164146	0.517979	0.283592	0.371753	0.345191
12	0.228214	0.242553	0.141262	0.625889	0.588422	0.199315	0.737989	0.556427	0.298635	0.407414	0.426776
13	0.821805	1	0.991364	0.0189113	0.824925	0.174299	0.55427	0	0.553087	0.122677	0.28724
14	0.245408	0.383188	0.218437	0.120925	0.840848	0.113555	0.469306	0.196585	0.263495	0.25954	0.305075
15	0.270418	0.355981	0.203284	1	0.731018	0.71095	0.416815	0.479249	0.535867	0.761977	0.340213
16	0.385307	0.595966	0.395604	0.735796	0.546558	0.260651	0.781139	0.319394	0.327105	0.62173	0.622185
17	0.692849	0.853455	0.753841	0.420007	0.44977	0.340963	0.682384	0.119063	0.724894	0.480344	0.88695
18	0.014068	0.0321896	0.00645684	0.0651691	0.679364	0.226462	0.571174	1	0.240693	0.37148	0.91015
19	0.216882	0.426099	0.22556	0.42635	0.564141	0.340283	0.515569	0.99653	0.350094	0.400264	0.748139
20	0.137554	0.321734	0.146479	0.562975	0.562394	0.229771	0.54048	0.560065	0.490444	0.529671	1
21	0.704181	0.89238	0.805604	0.315573	0	0.337443	0.946174	0.355526	0.659189	0.150908	0
22	0	0.126274	0.0337795	0.0139752	0.452065	0.143882	0.785587	0.543431	0.157004	0.273677	0.0329628
23	0.288785	0.584071	0.355384	0.337246	0.535297	0.314272	0.280249	0.279163	0.405027	0.525606	0.0898985
24	0.272372	0.617271	0.367553	0.340399	0.686847	0	0.788256	0.197591	0.283808	0.399176	0.105655
25	0.69363	0.748041	0.585642	0.0338713	0.448858	0.228397	0.842527	0.518645	0.678817	0.807812	0.394055
26	0.0394685	0.169005	0.0581241	0.0991418	0.580323	0.16792	0.882562	0.678537	0.141953	0.111925	0.539874
27	0.594764	0.88539	0.168443	0.608	0.427968	0.570557	0.551157	0.156426	0.357539	0.748715	0.856307
28	0.285268	0.591391	0.355441	0.264749	0.651883	0.0813005	0.873221	0.35729	0.232596	0.398204	0.968922
29	0.821024	1.0072	1	0	0.688902	0.289066	0.684609	0.560657	0.51096	0.000184722	0.277767
30	0.0570535	0.0547974	0.0234712	0.253957	0.551558	0	1	0.0762854	0	0.284279	0.522571
31	0.753029	0.973563	0.919979	0.726852	0.269068	1	0	0.399166	1	1	0.535718
32	0.393513	0.571592	0.382601	0.655831	0.659907	0.454152	0.178826	0.196689	0.704853	0.860373	0.613775
	D-D	D-MWD	D-GMD	PAD	SOC	TN	BD	AP	TP	AN	D-WR0.25
F1	0.409513	0.422163	0.398267	0.10355	-0.153216	0.342978	-0.267073	-0.168678	0.429192	0.242709	0.0131194
F2	-0.239909	-0.210685	-0.29156	0.509721	-0.0203888	0.300395	-0.302434	0.272531	0.00203888	0.430204	0.333697
F3	0.0229673	0.0569929	0.042532	-0.242432	-0.665201	-0.0561423	0.460196	0.284114	0.0204154	0.200751	0.395548
F	0.562202	0.26726	0.170525				F1			F2			F3
	F1	F2	F3	F	0-20cm	NG	1.20073	0-20cm	NG	-0.00539402	0-20cm	NG	0.358734
1	1.23862	0.126724	0.418382			HD	-0.0902824		HD	0.296298		HD	0.395522
2	-0.108777	0.406069	0.556491			MD	0.243216		MD	0.349287		MD	0.0139692
3	-0.0333562	0.465919	-0.0608428			LD	0.417756		LD	0.482798		LD	0.418499
4	0.362644	0.720426	0.767289		20-40cm	NG	1.13286	20-40cm	NG	-0.389286	20-40cm	NG	0.18861
5	1.15026	0.232621	-0.055863			HD	-0.0619728		HD	0.0448711		HD	0.170397
6	-0.0198469	0.0957179	0.233571			MD	1.09013		MD	0.759455		MD	0.037793
7	-0.125881	0.0848318	-0.285404			LD	0.604399		LD	0.446656		LD	0.270699
8	0.468849	0.57804	0.418461		0-40cm	NG	1.16679	0-40cm	NG	-0.19734	0-40cm	NG	0.273672
9	1.19456	-0.248083	-0.0749146			HD	-0.0761276		HD	0.170585		HD	0.28296
10	-0.169537	-0.0963455	0.0358949			MD	0.666672		MD	0.554371		MD	0.0258811
11	0.431192	0.771653	-0.390425			LD	0.511077		LD	0.464727		LD	0.344599
12	0.236829	0.46661	0.225133			F		F	0.562202	0.26726	0.170525
13	1.21177	-0.669582	-0.0404691					F	F1	F2	F3	F=0.56F1+0.27F2+0.17F3
14	0.293485	0.000947086	-0.108279			0-20cm	CK	0.734783	1.20073	-0.00539402	0.358734
15	0.804603	0.956215	-0.107019				HD	0.0958779	-0.0902824	0.296298	0.395522
16	0.685744	0.435424	0.330873				MD	0.232469	0.243216	0.349287	0.0139692
17	1.27279	0.071688	0.486381				LD	0.43526	0.417756	0.482798	0.418499
18	-0.113566	0.639161	0.508468
19	0.384388	0.638689	0.444944			20-40cm	CK	0.565017	1.13286	-0.389286	0.18861
20	0.414778	0.752762	0.423979				HD	0.00620796	-0.0619728	0.0448711	0.170397
21	1.14124	-0.45261	0.586035				MD	0.822288	1.09013	0.759455	0.037793
22	-0.11894	0.0442451	0.283559				LD	0.505328	0.604399	0.446656	0.270699
23	0.747714	0.207707	-0.0428197					F	F1	F2	F3
24	0.424752	-0.120037	0.0642651			0-40cm	CK	0.6499	1.16679	-0.19734	0.273672
25	1.02623	-0.0510947	0.630835				HD	0.0510429	-0.0761276	0.170585	0.28296
26	-0.165386	0.173723	0.431364				MD	0.527379	0.666672	0.554371	0.0258811
27	1.05032	0.578758	0.401567				LD	0.470294	0.511077	0.464727	0.344599
28	0.379171	0.177802	0.524301
29	1.09886	-0.588387	0.238988
30	-0.206453	0.10116	0.322609
31	2.07439	0.731195	0.247048
32	1.11585	0.706786	0.0024896

## Sheet: linear regression
BD	F	MWD	GMW	PAD	D	>2mm	0.5-2mm	0.25-0.5mm	<0.25mm
148.84	0.693852	4.58076	1.79569	66.3785	2.7766	1.997	1.855	1.281	1.369
152.96	0.204518	2.55224	0.533192	79.6934	2.9163	1.84	1.223	0.427	0.814
147.95	0.481292	2.44865	0.551969	47.298	2.8898	1.399	1.17	0.275	0.625
151.6	0.577146	2.86054	0.690026	51.3575	2.8778	1.051	1.908	0.461	0.817
138.92	0.645947	4.16019	1.42823	62.8459	2.8071	1.449	1.697	1.022	1.254
153.19	0.174307	2.73011	0.599732	71.7688	2.9088	1.104	1.472	0.68	0.733
150.3	0.331949	2.53313	0.543174	48.24	2.9103	0.875	1.15	0.488	0.616
151.31	0.625063	3.0032	0.719991	43.6637	2.8182	0.965	1.214	0.492	0.786
142.18	0.4714	4.20634	1.42472	76.9226	2.6701	1.557	1.828	1.057	1.584
154.96	0.100202	2.13015	0.43792	74.7296	2.9175	1.275	1.277	0.354	0.811
137.42	1.1116	2.94491	0.722812	19.4599	2.8752	1.313	1.056	0.485	0.721
150.32	0.708442	2.7842	0.687977	42.9356	2.8676	1.038	0.7	0.449	0.953
146.19	0.298245	4.82667	2.1928	88.2322	2.7157	1.774	1.638	1.028	1.523
144.28	0.292124	3.16343	0.82459	80.6193	2.8632	1.504	1.008	0.74	1.484
143.1	1.26337	3.09006	0.797766	15.0169	2.8568	1.077	1.154	0.438	0.817
151.29	1.0166	3.73719	1.13821	34.7336	2.8274	1.117	0.78	0.448	1
149.07	0.782106	4.43151	1.77234	58.2999	2.7487	2.313	2.155	1.721	1.95
146.57	0.244378	2.21695	0.449349	84.7802	2.9224	2.317	2.059	0.554	0.813
145.32	0.503301	3.27914	0.837198	57.8264	2.8705	1.51	1.333	0.301	0.803
145.88	0.634631	2.99771	0.697212	47.6306	2.8908	1.378	0.917	0.286	0.81
155	0.349176	4.53647	1.86397	66.0934	2.7458	1.936	2.024	1.295	1.651
151.39	0.0308538	2.47065	0.497715	88.6006	2.926	1.843	2.699	0.635	0.789
140.03	0.47751	3.70511	1.06701	64.476	2.8521	0.938	1.016	0.434	0.778
151.45	0.357065	3.79464	1.08855	64.2407	2.8563	0.996	0.905	0.351	0.726
152.67	0.297805	4.14726	1.4746	87.1158	2.7485	1.812	1.795	1.004	1.367
153.57	0.113687	2.58587	0.540809	82.2449	2.9159	1.534	1.209	1.307	0.834
146.12	1.12988	4.51763	0.736093	44.2705	2.7738	0.876	0.566	0.35	0.771
153.36	0.506773	3.72485	1.06711	69.8862	2.853	1.019	0.497	0.343	0.787
149.12	0.220856	4.8461	2.20809	89.6435	2.7159	1.692	2.089	1.093	1.284
156.21	0.157124	2.27791	0.479468	70.6916	2.9114	1.412	0.74	0.231	0.633
133.73	1.44175	4.75539	2.06644	35.4011	2.7333	1.315	1.195	0.823	0.971
137.75	1.09411	3.67146	1.11519	40.7011	2.8253	1.519	0.93	0.6	1.093
MWD
	>2mm	0.5-2mm	0.25-0.5mm	<0.25mm			intercept (b)	b	slope (a)	a
n	32	32	32	32				SE		SE	adjusted R2	P
df	30	30	30	30		>2mm	1.13606	0.29209	0.08582	0.08267	0.0025	0.3075
Residual sum of squares	4.77689	8.44379	2.99912	2.01261		0.5-2mm	0.98206	0.38834	0.10822	0.10991	-0.000982347	0.333
Pearson's R	0.18622	0.17694	0.57332	0.67987		0.25-0.5mm	-0.19014	0.23144	0.25104	0.0655	0.30632	<0.05
R2(COD)	0.03468	0.03131	0.32869	0.46222		<0.25mm	0.06421	0.18959	0.27247	0.05366	0.44429	<0.05
adjusted R2	0.0025	-0.000982347	0.30632	0.44429
	>2mm	y=0.086x+1.136	R=0.186	P=0.308
	0.5-2mm	y=0.108x+0.982	R=0.177	P=0.333
	0.25-0.5mm	y=0.251x-0.190	R=0.573	P<0.05
	<0.25mm	y=0.272x+0.064	R=0.680	P<0.05
GMW
	>2mm	0.5-2mm	0.25-0.5mm	<0.25mm			intercept (b)	b	slope (a)	a
n	32	32	32	32				SE		SE	adjusted R2	P
df	30	30	30	30		>2mm	1.16007	0.14455	0.26158	0.12398	0.10018	0.04333
Residual sum of squares	4.30913	7.67381	2.4128	1.64501		0.5-2mm	1.00798	0.1929	0.33407	0.16545	0.0903	0.05248
Pearson's R	0.35945	0.34589	0.67818	0.74863		0.25-0.5mm	0.18616	0.10817	0.46893	0.09277	0.44193	1.99705e-05
R2(COD)	0.1292	0.11964	0.45993	0.56044		<0.25mm	0.50897	0.08931	0.47377	0.0766	0.54579	8.3298e-07
adjusted R2	0.10018	0.0903	0.44193	0.54579
	>2mm	y=0.262x+1.160	R=0.359	P<0.05
	0.5-2mm	y=0.334x+1.008	R=0.346	P=0.052
	0.25-0.5mm	y=0.469x+0.186	R=0.678	P<0.05
	<0.25mm	y=0.474x+0.509	R=0.749	P<0.05
D
	>2mm	0.5-2mm	0.25-0.5mm	<0.25mm			intercept (b)	b	slope (a)	a
n	32	32	32	32				SE		SE	adjusted R2	P
df	30	30	30	30		>2mm	5.04779	2.77144	-1.27446	0.97609	0.02223	0.20158
Residual sum of squares	4.68241	8.15091	2.8726	1.64571		0.5-2mm	6.62803	3.65657	-1.85838	1.28782	0.03374	0.15937
Pearson's R	-0.23189	-0.25477	-0.59751	-0.7485		0.25-0.5mm	9.52732	2.17074	-3.12027	0.76452	0.33558	0.000305223
R2(COD)	0.05377	0.06491	0.35701	0.56026		<0.25mm	11.153	1.64304	-3.57753	0.57867	0.5456	8.38431e-07
adjusted R2	0.02223	0.03374	0.33558	0.5456
	>2mm	y=-1.27x+5.05	R=-0.232	P=0.202
	0.5-2mm	y=-1.86x+6.63	R=-0.255	P=0.159
	0.25-0.5mm	y=-3.12x+9.53	R=-0.598	P<0.05
	<0.25mm	y=-3.58x+11.15	R=-0.749	P<0.05

## Sheet: SOC
		>2				0.5-2				0.25-0.5				<0.25
		①	②	③	④	①	②	③	④	①	②	③	④	①	②	③	④
0-20cm	NG	1.997	2.313	1.449	1.936	1.855	2.155	1.697	2.024	1.281	1.721	1.022	1.295	1.369	1.95	1.254	1.651
	HD	1.84	2.317	1.104	1.843	1.223	2.059	1.472	2.699	0.427	0.554	0.68	0.635	0.814	0.813	0.733	0.789
	MD	1.399	1.51	0.875	0.938	1.17	1.333	1.15	1.016	0.275	0.301	0.488	0.434	0.625	0.803	0.616	0.778
	LD	1.051	1.378	0.965	0.996	1.908	0.917	1.214	0.905	0.461	0.286	0.492	0.351	0.817	0.81	0.786	0.726
20-40cm	NG	1.557	1.812	1.774	1.692	1.828	1.795	1.638	2.089	1.057	1.004	1.028	1.093	1.584	1.367	1.523	1.284
	HD	1.275	1.534	1.504	1.412	1.277	1.209	1.008	0.74	0.354	1.307	0.74	0.231	0.811	0.834	1.484	0.633
	MD	1.313	0.876	1.077	1.315	1.056	0.566	1.154	1.195	0.485	0.35	0.438	0.823	0.721	0.771	0.817	0.971
	LD	1.038	1.019	1.117	1.519	0.7	0.497	0.78	0.93	0.449	0.343	0.448	0.6	0.953	0.787	1	1.093
0-20cm		>2mm	2-0.5mm	0.5-0.25mm	<0.25mm		20-40cm		>2mm	2-0.5mm	0.5-0.25mm	<0.25mm		SUM	0-20cm	20-40cm
average	NG	1.925	1.935	1.33	1.555		average	NG	1.7075	1.84	1.045	1.4375		average	6.7425	6.0325
	HD	1.775	1.8625	0.575	0.785			HD	1.43	1.06	0.6575	0.9375			5	4.09
	MD	1.1825	1.1675	0.375	0.7075			MD	1.1475	0.995	0.525	0.82			3.43	3.4825
	LD	1.1	1.2375	0.3975	0.7875			LD	1.175	0.7275	0.46	0.9575			3.5175	3.32
SE	NG	0.1779	0.0995	0.1448	0.1561		SE	NG	0.0551	0.0932	0.0194	0.0686		SE	0.5619	0.045
	HD	0.2518	0.3301	0.0555	0.0189			HD	0.0561	0.121	0.2432	0.1863			0.4999	0.4405
	MD	0.1594	0.0636	0.0507	0.0478			MD	0.105	0.1446	0.1025	0.054			0.1892	0.3569
	LD	0.0948	0.2347	0.0468	0.0202			LD	0.117	0.0896	0.0534	0.0629			0.2631	0.3102
0.05	NG	a	a	a	a		0.05	NG	a	a	a	a		0.05	a	a
	HD	a	ab	b	b			HD	b	b	ab	b			b	b
	MD	b	bc	b	b			MD	c	b	b	b			c	b
	LD	b	c	b	b			LD	bc	b	b	b			c	b
Soil layer/cm	Site	Aggregate size /mm
		>2	2-0.5	0.5-0.25	<0.25	≥0.25	Sum			SUM	①	②	③	④
0-20	CK	1.93±0.18a	1.94±0.10a	1.33±0.14a	1.56±0.16a	5.19±0.41a	6.74±0.56a		0-20cm	NG	6.502	8.139	5.422	6.906
	HD	1.78±0.25a	1.86±0.33ab	0.58±0.06b	0.79±0.02b	4.22±0.49a	5.00±0.50b			HD	4.304	5.743	3.989	5.966
	MD	1.18±0.16b	1.17±0.06bc	0.38±0.05b	0.71±0.05b	2.72±0.17b	3.43±0.19c			MD	3.469	3.947	3.129	3.166
	LD	1.10±0.09b	1.24±0.23c	0.40±0.05b	0.79±0.02b	2.73±0.25b	3.52±0.26c			LD	4.237	3.391	3.457	2.978
20-40	CK	1.71±0.06a	1.84±0.09a	1.05±0.02a	1.44±0.07a	4.59±0.10a	6.03±0.05a		20-40cm	NG	6.026	5.978	5.963	6.158
	HD	1.43±0.06b	1.06±0.12b	0.66±0.24ab	0.94±0.19b	3.15±0.35b	4.09±0.44b			HD	3.717	4.884	4.736	3.016
	MD	1.15±0.11c	1.00±0.14b	0.53±0.10b	0.82±0.05b	2.66±0.32b	3.48±0.36b			MD	3.575	2.563	3.486	4.304
	LD	1.18±0.12bc	0.73±0.09b	0.46±0.05b	0.96±0.06b	2.36±0.25b	3.32±0.31b			LD	3.14	2.646	3.345	4.142
		①						②						③						④
		>2mm	2-0.5mm	0.5-0.25mm	<0.25mm	>0.25mm	SUM	>2mm	2-0.5mm	0.5-0.25mm	<0.25mm	>0.25mm	SUM	>2mm	2-0.5mm	0.5-0.25mm	<0.25mm	>0.25mm	SUM	>2mm	2-0.5mm	0.5-0.25mm	<0.25mm	>0.25mm	SUM
0-20cm	NG	1.997	1.855	1.281	1.369	5.133	6.502	2.313	2.155	1.721	1.95	6.189	8.139	1.449	1.697	1.022	1.254	4.168	5.422	1.936	2.024	1.295	1.651	5.255	6.906
	HD	1.84	1.223	0.427	0.814	3.49	4.304	2.317	2.059	0.554	0.813	4.93	5.743	1.104	1.472	0.68	0.733	3.256	3.989	1.843	2.699	0.635	0.789	5.177	5.966
	MD	1.399	1.17	0.275	0.625	2.844	3.469	1.51	1.333	0.301	0.803	3.144	3.947	0.875	1.15	0.488	0.616	2.513	3.129	0.938	1.016	0.434	0.778	2.388	3.166
	LD	1.051	1.908	0.461	0.817	3.42	4.237	1.378	0.917	0.286	0.81	2.581	3.391	0.965	1.214	0.492	0.786	2.671	3.457	0.996	0.905	0.351	0.726	2.252	2.978
20-40cm	NG	1.557	1.828	1.057	1.584	4.442	6.026	1.812	1.795	1.004	1.367	4.611	5.978	1.774	1.638	1.028	1.523	4.44	5.963	1.692	2.089	1.093	1.284	4.874	6.158
	HD	1.275	1.277	0.354	0.811	2.906	3.717	1.534	1.209	1.307	0.834	4.05	4.884	1.504	1.008	0.74	1.484	3.252	4.736	1.412	0.74	0.231	0.633	2.383	3.016
	MD	1.313	1.056	0.485	0.721	2.854	3.575	0.876	0.566	0.35	0.771	1.792	2.563	1.077	1.154	0.438	0.817	2.669	3.486	1.315	1.195	0.823	0.971	3.333	4.304
	LD	1.038	0.7	0.449	0.953	2.187	3.14	1.019	0.497	0.343	0.787	1.859	2.646	1.117	0.78	0.448	1	2.345	3.345	1.519	0.93	0.6	1.093	3.049	4.142
	>0.25mm	①	②	③	④		>0.25mm	0-20cm	20-40cm
0-20cm	NG	5.133	6.189	4.168	5.255		average	5.1875	4.59
	HD	3.49	4.93	3.256	5.177			4.215	3.1475
	MD	2.844	3.144	2.513	2.388			2.72	2.66
	LD	3.42	2.581	2.671	2.252			2.73	2.3625
20-40cm	NG	4.442	4.611	4.44	4.874		SE	0.4132	0.1016
	HD	2.906	4.05	3.252	2.383			0.4899	0.3501
	MD	2.854	1.792	2.669	3.333			0.1693	0.3217
	LD	2.187	1.859	2.345	3.049			0.2471	0.2508
							0.05	a	a
								a	b
								b	b
								b	b
Soil layer/cm	Site	Aggregate size /mm
		>2	2-0.5	0.5-0.25	<0.25	Sum
0-20	CK	1.93±0.18a	1.94±0.10a	1.33±0.14a	1.56±0.16a	6.74±0.56a
	HD	1.78±0.25a	1.86±0.33ab	0.58±0.06b	0.79±0.02b	5.00±0.50b
	MD	1.18±0.16b	1.17±0.06bc	0.38±0.05b	0.71±0.05b	3.43±0.19c
	LD	1.10±0.09b	1.24±0.23c	0.40±0.05b	0.79±0.02b	3.52±0.26c
20-40	CK	1.71±0.06a	1.84±0.09a	1.05±0.02a	1.44±0.07a	6.03±0.05a
	HD	1.43±0.06b	1.06±0.12b	0.66±0.24ab	0.94±0.19b	4.09±0.44b
	MD	1.15±0.11c	1.00±0.14b	0.53±0.10b	0.82±0.05b	3.48±0.36b
	LD	1.18±0.12bc	0.73±0.09b	0.46±0.05b	0.96±0.06b	3.32±0.31b
